# Supplementary material
Source: Springer Nature journal article supplement (https://www.springermedizin.de/resource/supplementary/12885_2011_2968_MOESM2_ESM.pdf/9462414)

**%  $\beta$ -Galactosidase**

100  
80  
60  
40  
20  
0

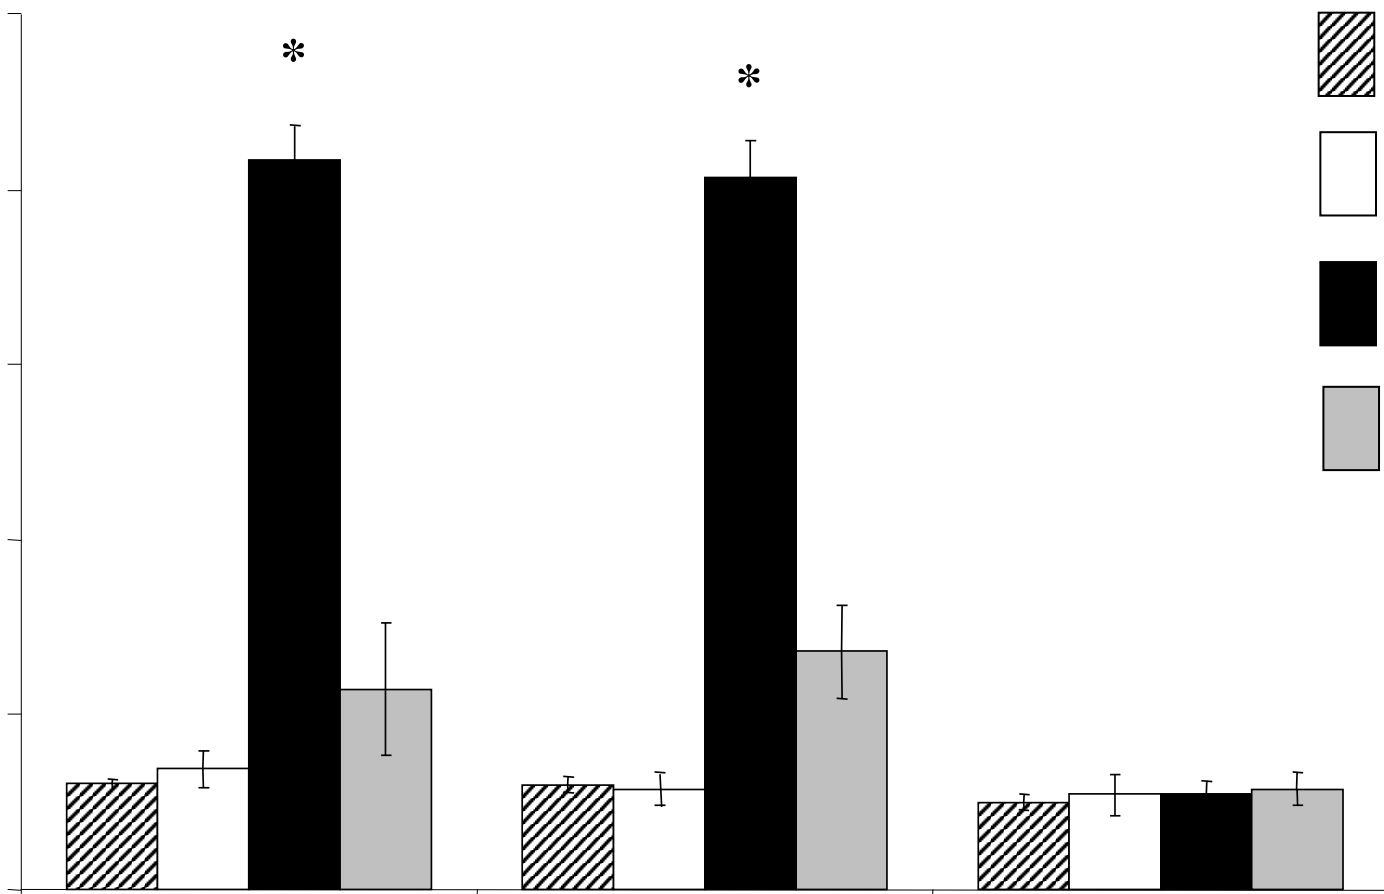

**HeLa**

**SiHa**

**HaCaT**

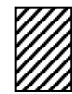

**CTL**

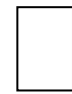

**PTX 8 mM**

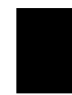

**CIS 4  $\mu$ M**

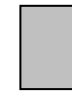

**PTX + CIS**

Supplement: MOESM2 [file 9462414]
